# Supplementary material
Source: PubMed Central journal article supplement (PMC6481682)
Supplement: NIHMS1504432-supplement-1.pdf [file NIHMS1504432-supplement-1.pdf]

# Supplementary Fig. 1

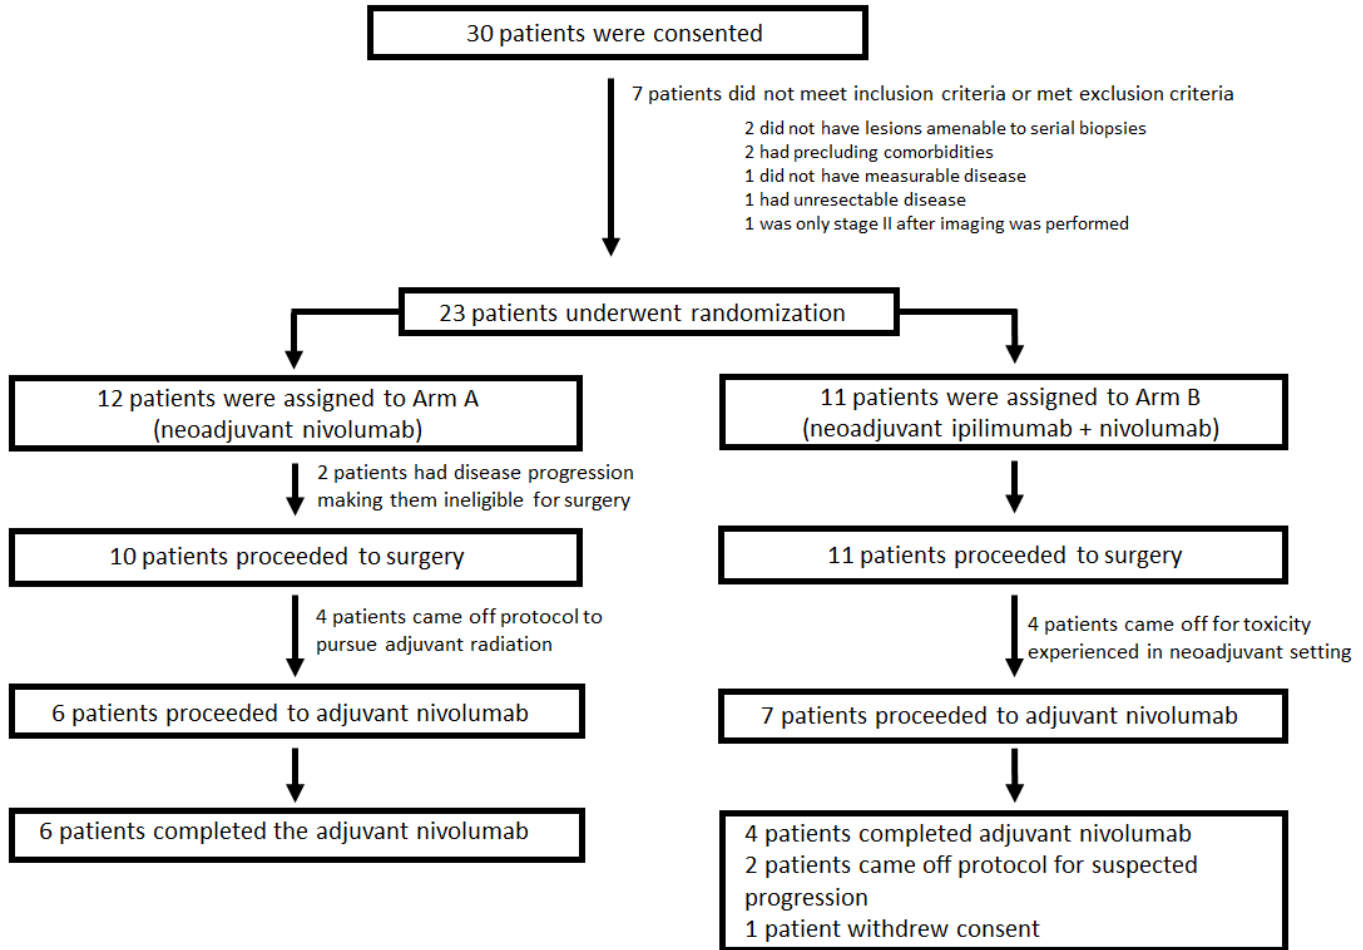

**CONSORT diagram.** Flow diagram of the progress through the phases of the non-comparative randomized trial of neoadjuvant nivolumab (Arm A) and ipilimumab with nivolumab (Arm B) followed by surgical resection and adjuvant nivolumab.

## Supplementary Fig. 2

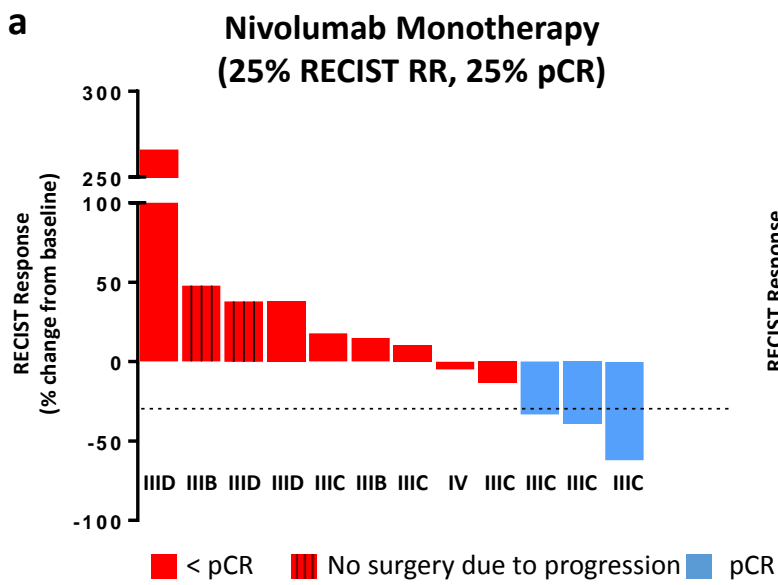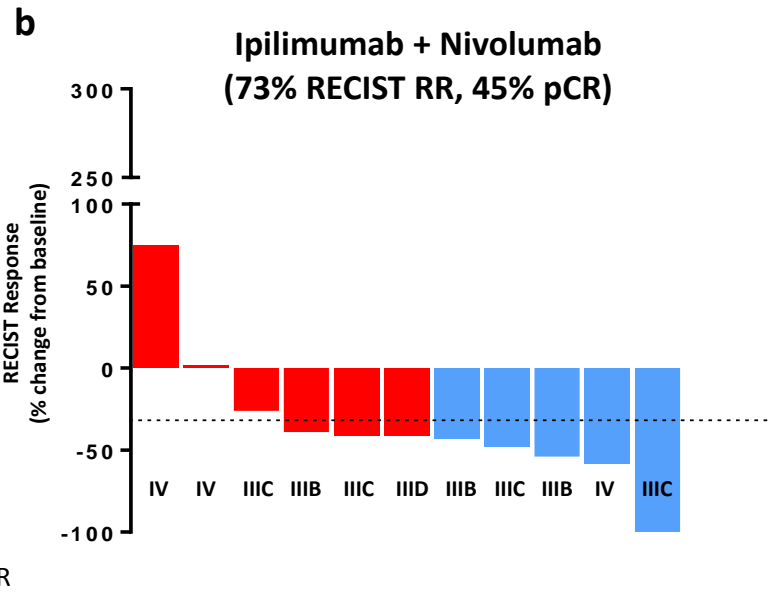

Radiographic and pathologic responses to neoadjuvant nivolumab (n=12) and combination ipilimumab with nivolumab (n=11) as broken down by AJCC 8<sup>th</sup> Edition staging system.

# Supplementary Fig. 3

## Relapse-free survival

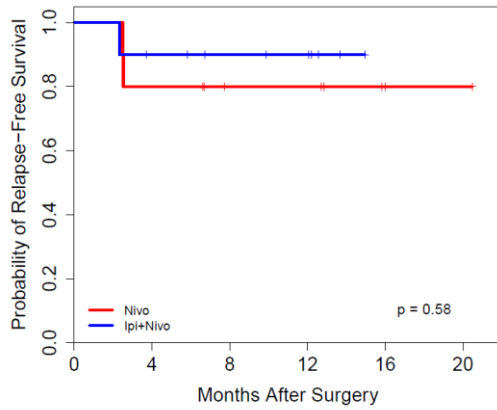

|          |    |   |   |   |   |   |
|----------|----|---|---|---|---|---|
| Nivo     | 10 | 8 | 5 | 5 | 2 | 1 |
| Ipi+Nivo | 10 | 8 | 6 | 5 | 0 | 0 |

**Relapse-free survival by Treatment Arm.** Kaplan-Meier estimate of relapse-free survival by treatment group by two-sided log-rank test. Survival rates were 90% (95% CI 47-99%) at 14.9 months with ipilimumab with nivolumab (n=10) versus 80% (41-95%) at 20.5 months with nivolumab monotherapy (n=10),  $p=0.58$ . The two patients who developed metastatic disease prior to surgery are not included in these survival curves.

# Supplementary Fig. 4

**a RFS combined treatment arms**

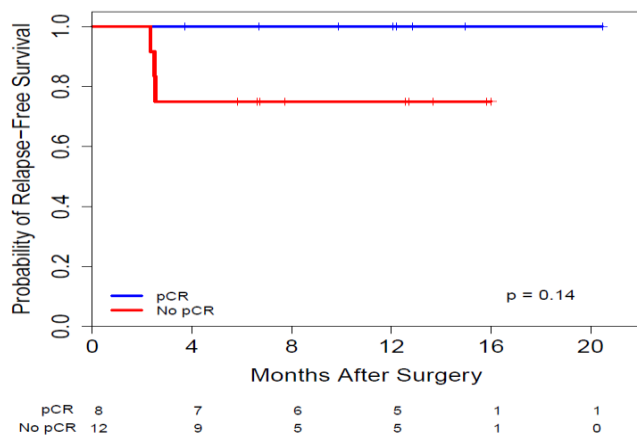

**b OS combined treatment arms**

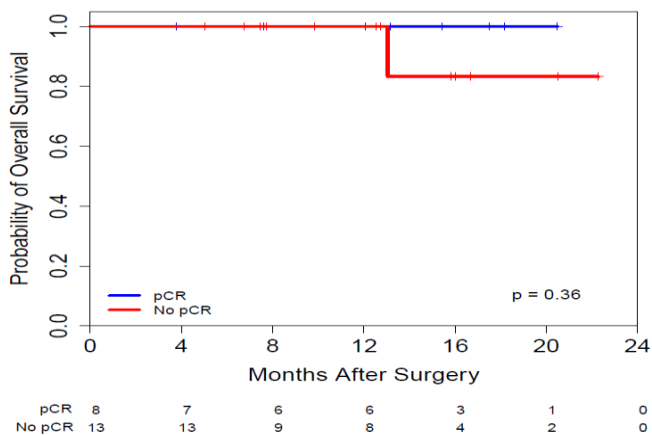

**c RFS nivolumab arm only**

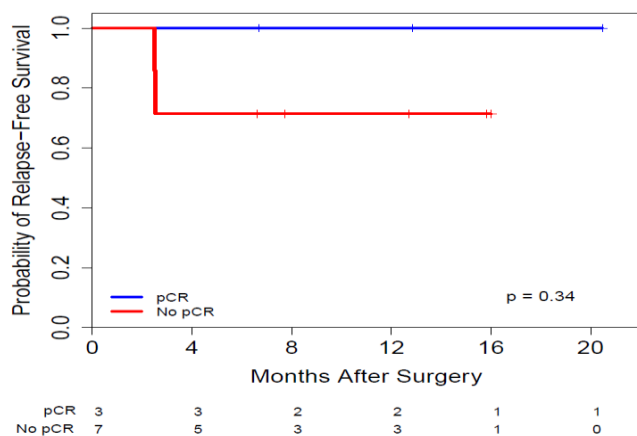

**d OS nivolumab arm only**

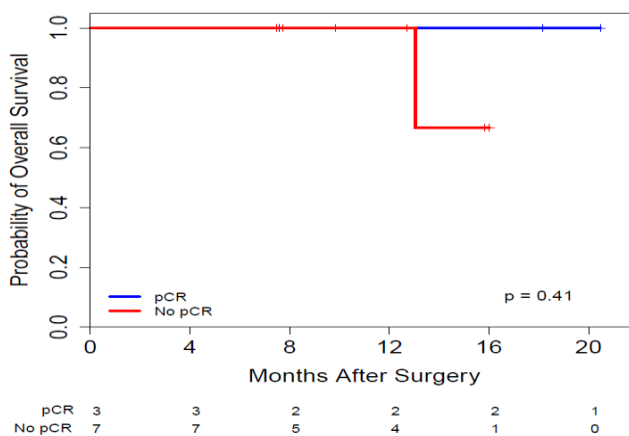

**e RFS ipilimumab+nivolumab arm only**

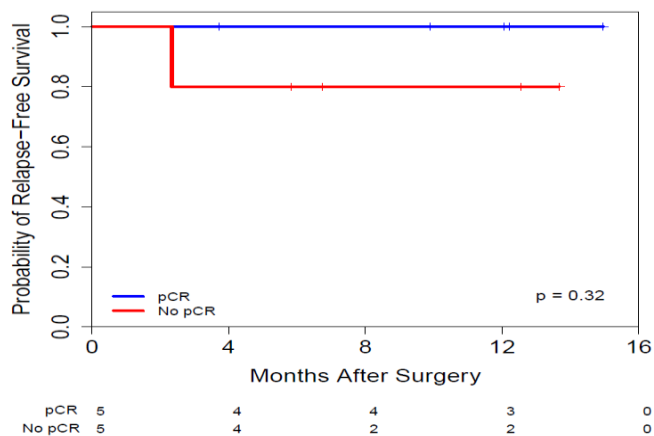

**f OS ipilimumab + nivolumab arm only**

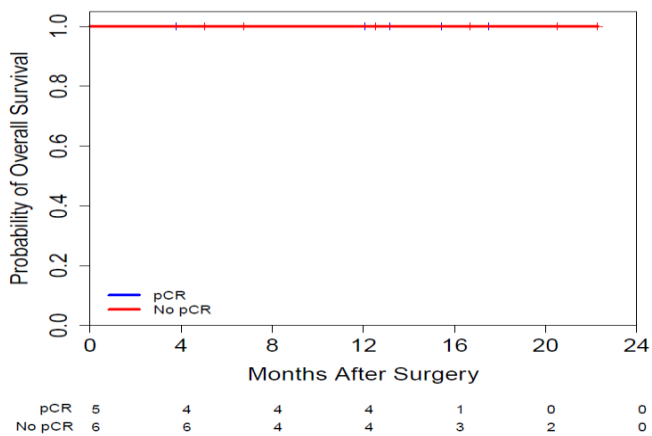

**Survival outcomes by pathologic complete response.** a,b, Kaplan-Meier estimates of relapse-free survival (RFS) and overall survival (OS) by pathologic complete response (pCR) status for combined treatment arms. For RFS, survival rates of 100% (95% CI 100-100%) at 20.5 months (mo) with pCR (n=8) vs 75% (41-91%) at 16.0 mo with non-pCR (n=12),  $p=0.14$ . For OS, rates of 100% (100-100%) at 20.5 mo with pCR (n=8) vs 83% (27-97%) at 22.3 months with non-pCR (n=13),  $p=0.36$ . c,d, Kaplan-Meier estimates of RFS and OS by pCR status for nivolumab arm only. For RFS, rates of 100% (100-100%) at 20.5 mo with pCR (n=3) vs 71% (26-92%) at 16.0 mo with non-pCR (n=7),  $p=0.34$ . For OS, rates of 100% (100-100%) at 20.5 mo with pCR (n=3) vs 67% (5-95%) at 16.0 mo with non-pCR (n=7),  $p=0.41$ . e,f, Kaplan-Meier estimates of RFS and OS by pCR status for ipilimumab with nivolumab arm only. For RFS, rates of 100% (100-100%) at 14.9 mo with pCR (n=5) vs 80% (20-97%) at 13.7 mo with non-pCR (n=5),  $p=0.32$ . For OS, rates of 100% (100-100%) at 17.5 mo with pCR (n=5) vs 100% (100-100%) at 22.3 mo with non-pCR (n=6). The two patients who developed metastatic disease prior to surgery are not included in these survival curves. Of note, all relapses were distant. Survival estimates were computed by two-sided log rank tests.

# Supplementary Fig. 5

**a RFS combined treatment arms**

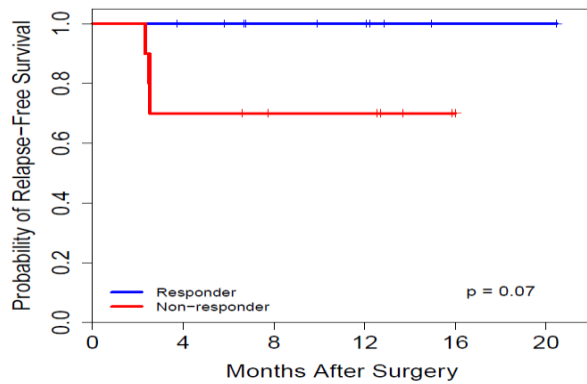

|               |    |   |   |   |   |   |
|---------------|----|---|---|---|---|---|
| Responder     | 10 | 7 | 5 | 5 | 1 | 0 |
| Non-Responder | 10 | 9 | 6 | 5 | 1 | 1 |

**b OS combined treatment arms**

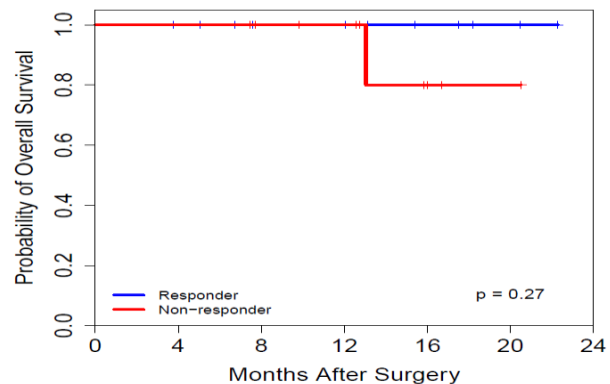

|               |    |    |   |   |   |   |   |
|---------------|----|----|---|---|---|---|---|
| Responder     | 11 | 10 | 7 | 7 | 4 | 2 | 0 |
| Non-Responder | 10 | 10 | 8 | 7 | 3 | 1 | 0 |

**c RFS nivolumab arm only**

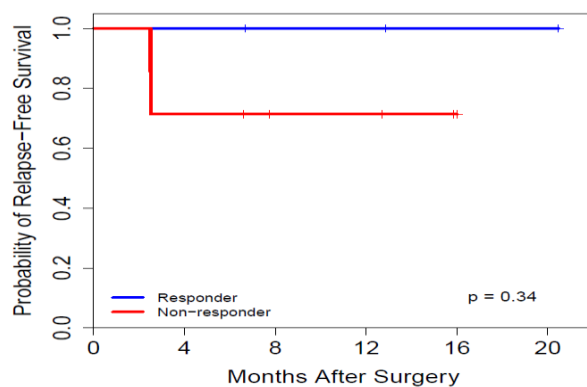

|               |   |   |   |   |   |   |
|---------------|---|---|---|---|---|---|
| Responder     | 3 | 3 | 2 | 2 | 1 | 1 |
| Non-Responder | 7 | 5 | 3 | 3 | 1 | 0 |

**d OS nivolumab arm only**

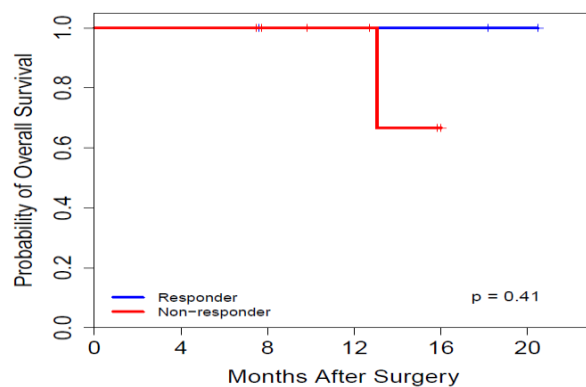

|               |   |   |   |   |   |   |
|---------------|---|---|---|---|---|---|
| Responder     | 3 | 3 | 2 | 2 | 2 | 1 |
| Non-Responder | 7 | 7 | 5 | 4 | 1 | 0 |

**e RFS ipilimumab+nivolumab arm only**

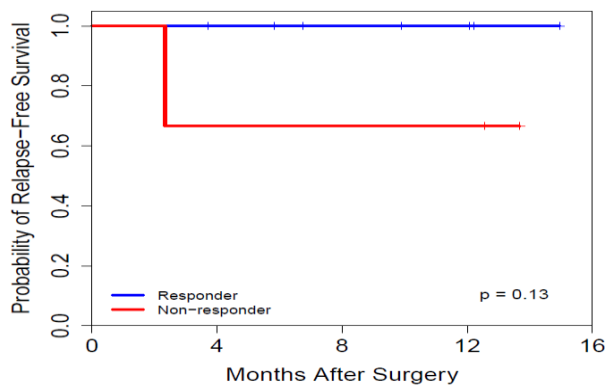

|               |   |   |   |   |   |
|---------------|---|---|---|---|---|
| Responder     | 7 | 6 | 4 | 3 | 0 |
| Non-Responder | 3 | 2 | 2 | 2 | 0 |

**f OS ipilimumab + nivolumab arm only**

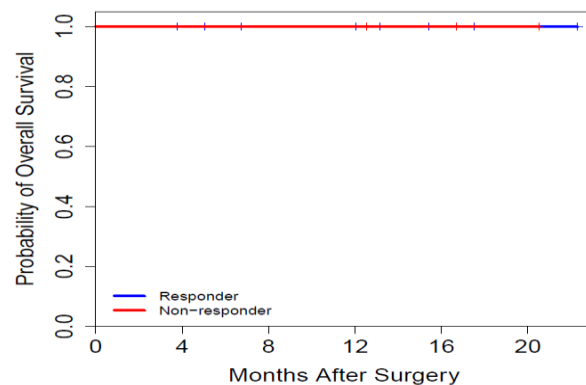

|               |   |   |   |   |   |   |
|---------------|---|---|---|---|---|---|
| Responder     | 8 | 7 | 5 | 5 | 2 | 1 |
| Non-Responder | 3 | 3 | 3 | 3 | 2 | 1 |

**Survival outcomes by radiographic response.** a,b, Kaplan-Meier estimates of relapse-free survival (RFS) and overall survival (OS) by radiographic response for combined treatment arms, with responders (R) defined as having a complete or partial response by RECIST 1.1 prior to surgery. For RFS, survival rates of 100% (95% CI 100-100%) at 20.5 months (mo) with R (n=10) vs 70% (33-89%) at 16.0 mo with NR (n=10),  $p=0.07$ . For OS, rates of 100% (100-100%) at 22.3 mo with R (n=11) vs 80% (20-97%) at 20.5 mo with NR (n=10),  $p=0.27$ . c,d, Kaplan-Meier estimates of RFS and OS by radiographic response for nivolumab arm only. For RFS, rates of 100% (100-100%) at 20.5 mo with R (n=3) vs 71% (26-92%) at 16.0 mo with NR (n=7),  $p=0.34$ . For OS, rates of 100% (100-100%) at 20.5 mo with R (n=3) vs 67% (5-95%) at 16.0 mo with NR (n=7),  $p=0.41$ . e,f, Kaplan-Meier estimates of RFS and OS by radiographic response for ipilimumab with nivolumab arm only. For RFS, rates of 100% (100-100%) at 14.9 mo with R (n=7) vs 67% (5-95%) at 13.7 mo with NR (n=3),  $p=0.13$ . For OS, rates of 100% (100-100%) at 22.3 mo with R (n=8) vs 100% (100-100%) at 20.5 mo with NR (n=3). The two patients who developed metastatic disease prior to surgery are not included in these survival curves. Of note, all relapses were distant. Survival estimates were computed by two-sided log rank tests.

# Supplementary Fig. 6

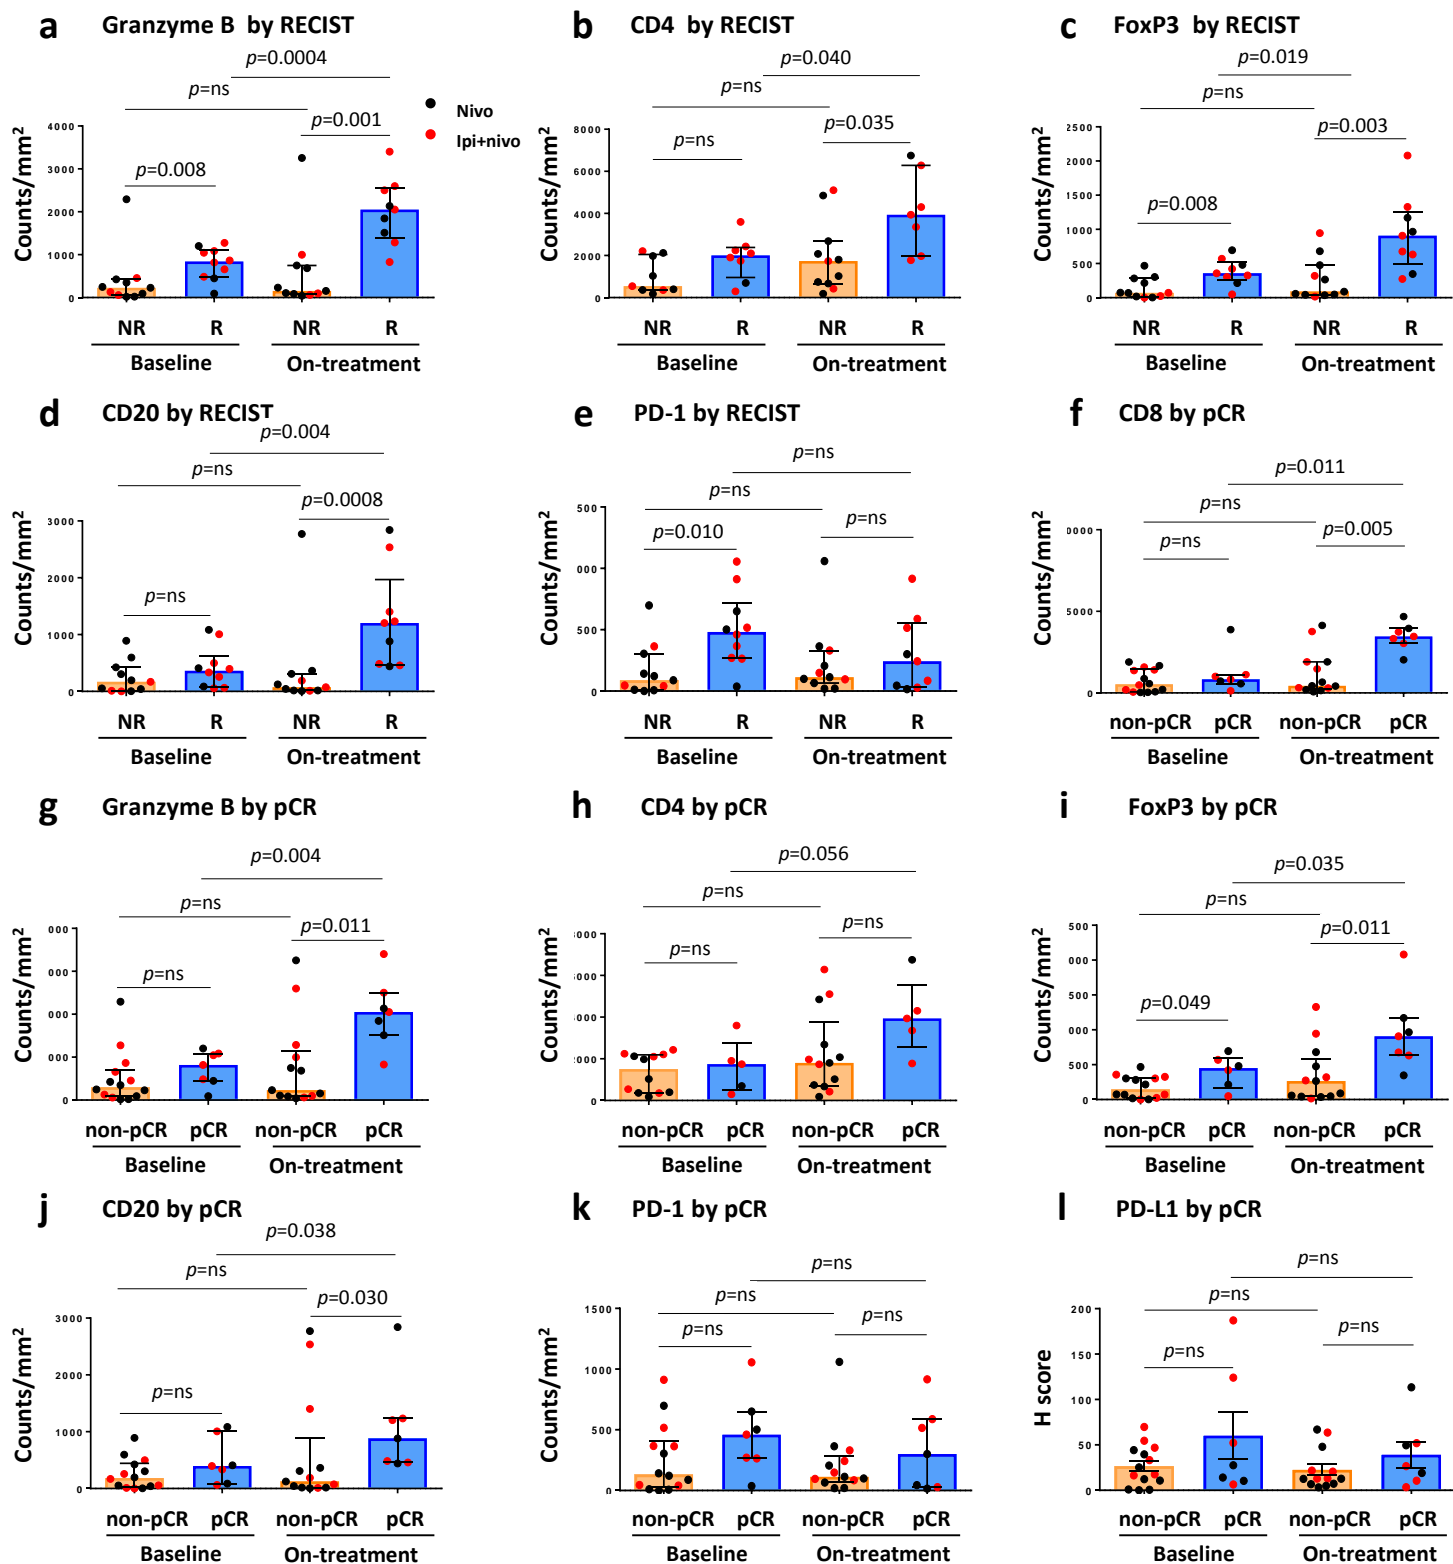

**Immune infiltration per singlet immunohistochemistry (IHC) by response to neoadjuvant immune checkpoint blockade.** a-e, Quantification by IHC of non-responders (NR) versus responders (R) at baseline (b/l) and on-treatment (on-tx), with R being defined as patients achieving a complete or partial response by RECIST 1.1. Shown are of quantifications of Granzyme B (n=11 NR and 10 R at b/l, n=11 NR and 9 R on-tx), CD4 (n=9 NR and 8 R at b/l, n=11 NR and 7 R on-tx), FoxP3 (n=11 NR and 9 R at b/l, n= 11 NR and 9 R on-tx), CD20 (n=11 NR and 10 R at b/l, n=11 NR and 9 R on-tx), and PD-1 (n=11 NR and 10 R at b/l, n=11 NR and 9 R on-tx). f-l, Quantification by IHC of NR versus R, with R being defined as patients achieving a pathologic complete response (pCR). Shown are quantifications of CD8 (n=14 NR and 7 R at b/l, n=13 NR and 7 R on-tx), Granzyme B (n=14 NR and 7 R at b/l, n=13 NR and 7 R on-tx), CD4 (n=12 NR and 5 R at b/l, n=13 NR and 5 R on-tx), FoxP3 (n=14 NR and 6 R at b/l, n=13 NR and 7 R on-tx), CD20 (n=14 NR and 7 R at b/l, n=13 NR and 7 R on-tx), PD-1 (n=14 NR and 7 R at b/l, n=13 NR and 7 R on-tx), and PD-L1 (n=14 NR and 7 R at b/l, n=13 NR and 7 R on-tx). Black dots indicate patients on nivolumab monotherapy arm and red dots patients on combination ipilimumab with nivolumab arm. Bar heights indicate median values of cell count density (for all markers except PD-L1 which is displayed as H score), and interquartile ranges are presented in addition to individual data points. All comparisons were made using Mann-Whitney U tests with two-sided analyses.

# Supplementary Fig. 7

**a** RECIST R vs NR nivolumab arm only

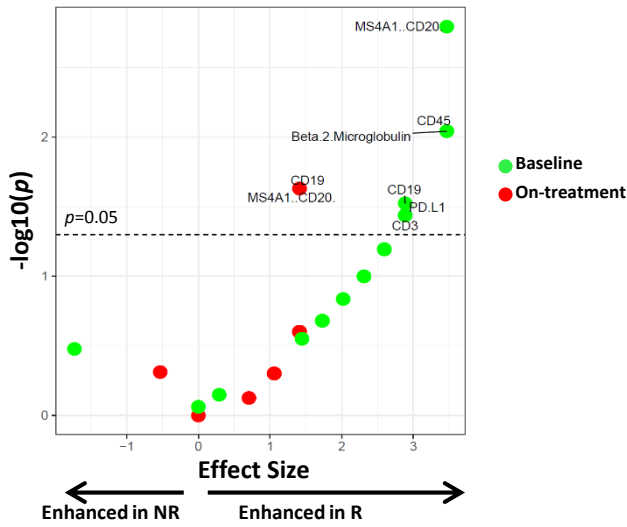

**b** RECIST R vs NR ipilimumab+nivolumab arm only

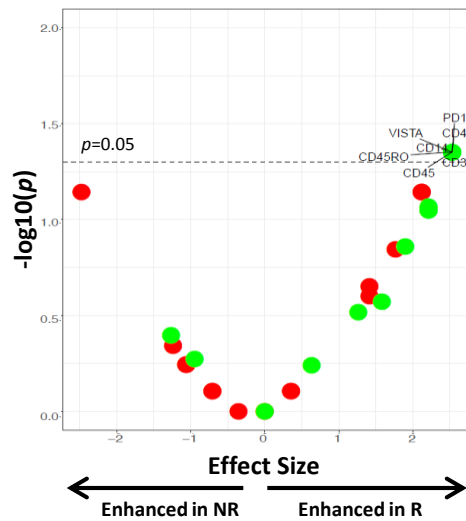

**c** pCR vs non-pCR combined treatment arms

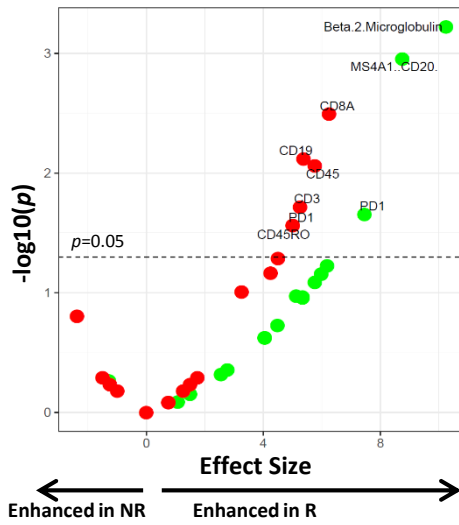

**d** pCR vs non-pCR nivolumab arm only

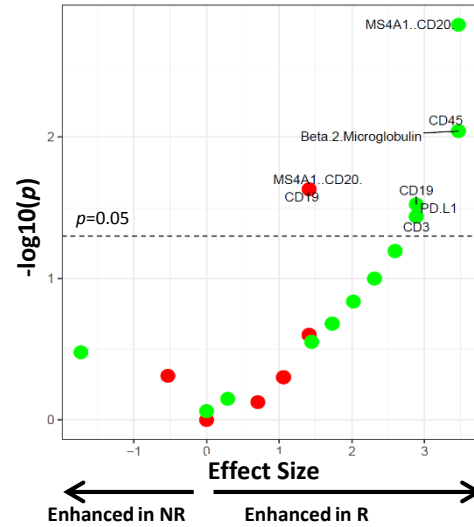

**e** pCR vs non-pCR ipilimumab+nivolumab arm only

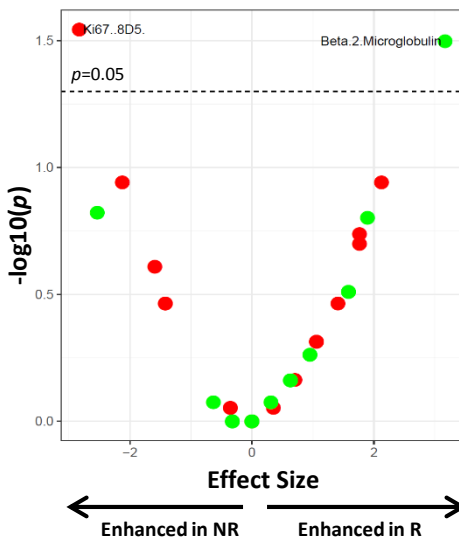

**Immune infiltration per multiplex immunohistochemistry (IHC) by response to neoadjuvant checkpoint blockade.** a-e, Volcano plots of pairwise two-sided Mann-Whitney comparisons of multiplex IHC marker expression between non-responders (NR) and responders (R) at baseline (b/l, green) and on-treatment (on-tx, red) samples. Immune marker expression was assessed on CD45 positive cells and quantified as expression per area of assayed tissue. a, b, comparisons of NR and R by RECIST 1.1 for nivolumab arm only (n=9 NR and 3 R at b/l, n=7 NR and 1 R on-tx) and ipilimumab with nivolumab arm only (n=2 NR and 8 R at b/l, n=3 NR and 5 R on-tx). c-e, Volcano plots of NR versus R by pathologic complete response (pCR) for combined arms (n=14 NR and 8 R at b/l, n=11 NR and 5 R on-tx), nivolumab arm only (n=9 NR and 3 R at b/l, n=7 NR and 1 R on-tx), and ipilimumab with nivolumab arm only (n=5 NR and 5 R at b/l, n=4 NR and 4 R on-tx).

# Supplementary Fig. 8

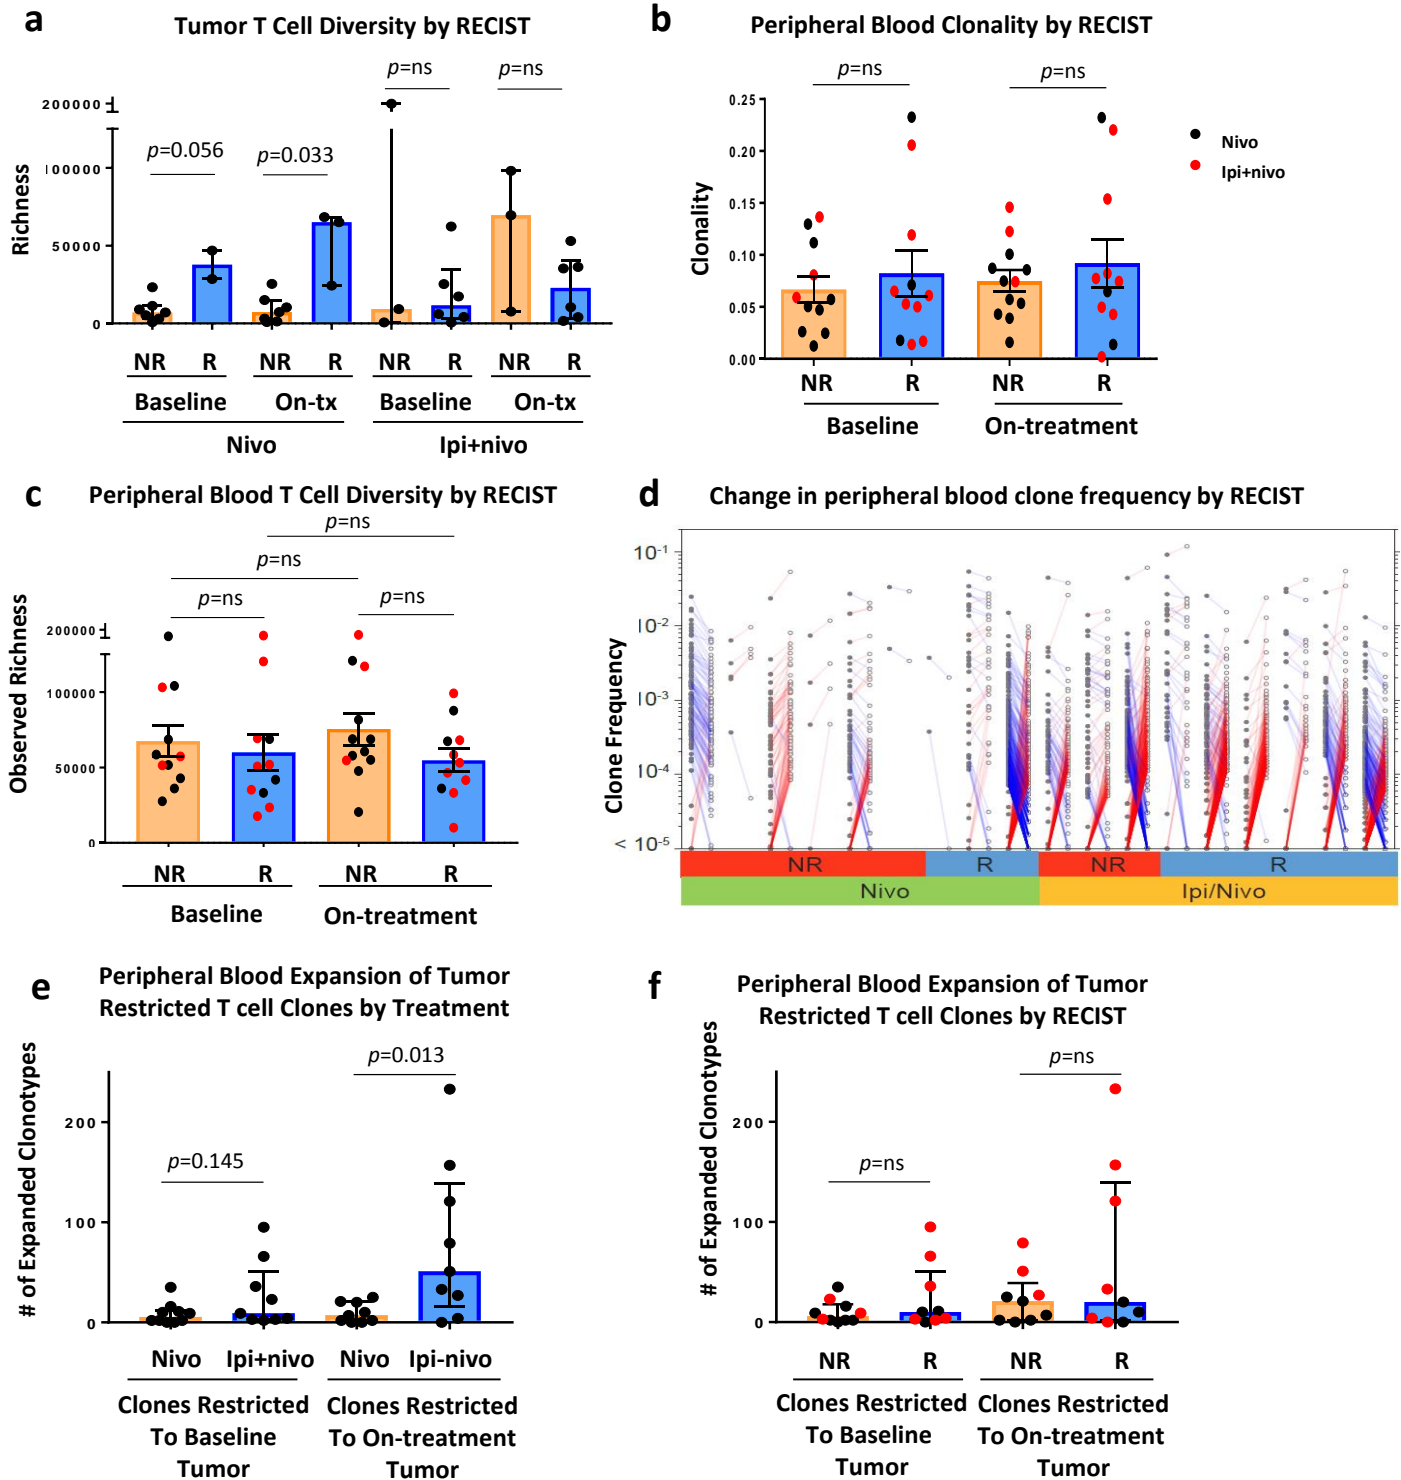

**T cell repertoire analysis of tumor and peripheral blood by RECIST response.** a, Tumor T cell richness scores between non-responders (NR) and responders (R) to nivolumab monotherapy (N) and ipilimumab with nivolumab combination (I+N), with response defined as having a complete or partial response by RECIST 1.1. Scores shown at baseline (b/l) ( $n=7$  NR and  $2$  R for N,  $n=3$  NR and  $6$  R for I+N) and on-treatment (on-tx) ( $n=7$  NR and  $3$  R for N,  $n=3$  NR and  $6$  R for I+N). b,c Peripheral blood clonality ( $n=11$  NR and  $11$  R at b/l,  $n=12$  NR and  $11$  R on-tx) and richness scores ( $n=11$  NR and  $11$  R at b/l,  $n=12$  NR and  $11$  R on-tx), respectively. d, Analysis of change in T cell repertoire in peripheral blood was performed using differential abundance analysis with significantly expanded and contracted clones shown. Differential abundance of clonotypes was assessed using a modification of the DESeq R package. e, Number of significantly expanded tumor restricted clonotypes in the peripheral blood shown by treatment type ( $n=10$  for N and  $9$  for I+N for b/l tumor restricted clones, and  $n=9$  for N and  $9$  for I+N for on-tx tumor restricted clones). f, Depiction of data from (e) by response,  $n=10$  NR and  $9$  R for b/l tumor restricted clones and  $n=9$  NR and  $9$  R for on-tx tumor restricted clones. For b, c, f, Black dots indicate patients on N arm and red dots patients on I+N arm. For a-c, e, f, Bar heights indicate median values, and interquartile ranges are presented in addition to individual data points. Comparisons were made using Mann-Whitney U tests with two-sided testing.



## Supplementary Fig. 9

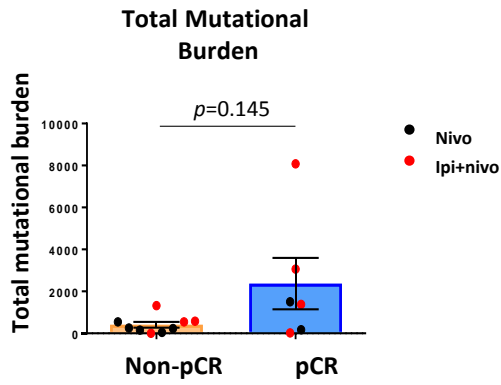

**Total mutational burden of tumor by pathologic response.** Bar heights represent median sum of non-synonymous exonic mutations, and interquartile ranges are presented in addition to individual data points. Comparisons were made using two-sided Mann-Whitney U tests by response, with response defined as having a pathologic complete response (pCR) (n=9 non-pCR and 6 pCR). Black dots indicate patients on nivolumab monotherapy arm and red dots patients on combination ipilimumab with nivolumab arm.

# Supplementary Fig. 10

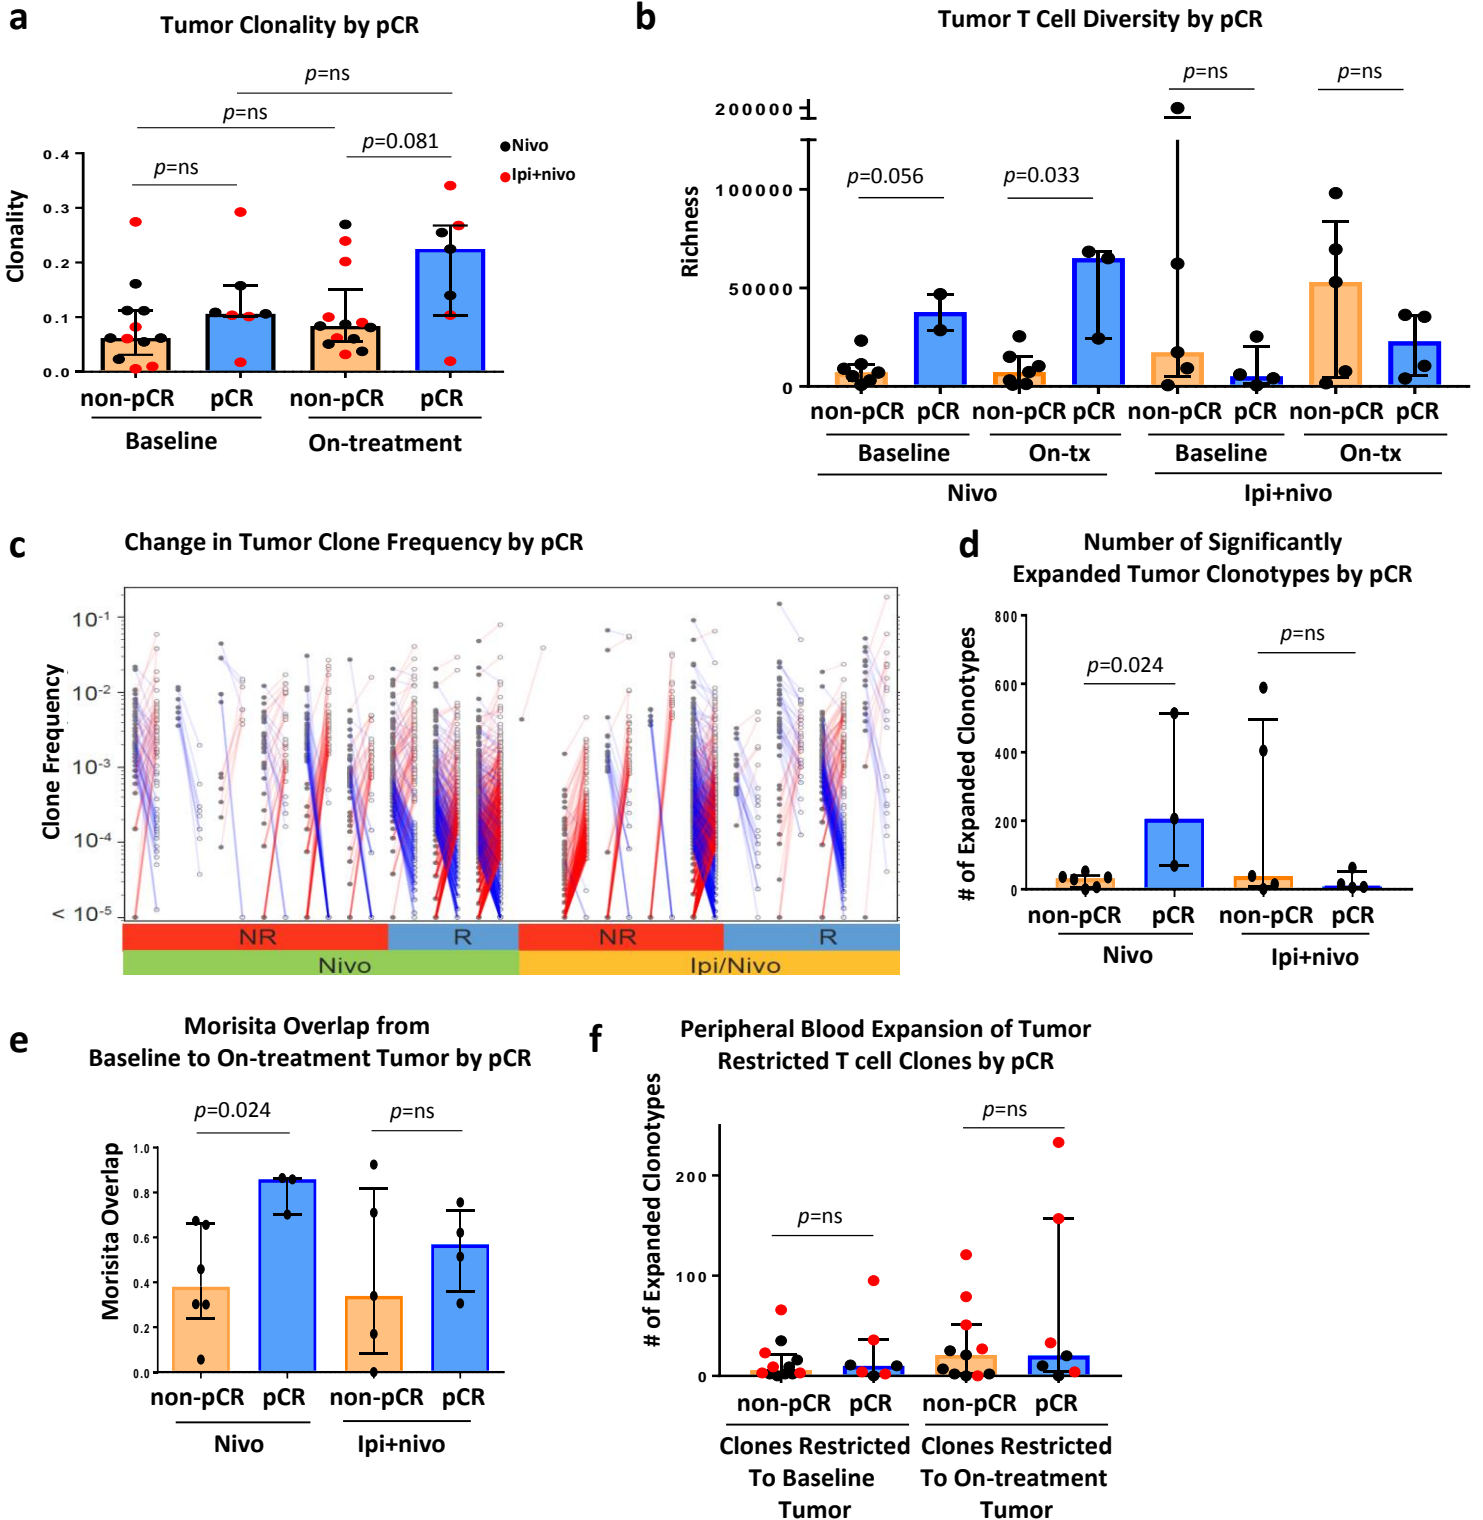

**T cell repertoire analysis of tumor and peripheral blood by pathologic response.** a, T cell clonality scores between non-responders (NR) and responders (R) at baseline (b/l) ( $n=12$  NR and  $7$  R) and on-treatment (on-tx) ( $n=13$  NR and  $7$  R), with R defined as those having a complete pathologic response (pCR) and NR as those who had less than a pCR (non-pCR). b, T cell richness scores between NR and R to nivolumab monotherapy (N) and ipilimumab with nivolumab combination (I+N). Scores shown at b/l ( $n=7$  NR and  $2$  R for N,  $n=5$  NR and  $4$  R for I+N) and on-tx ( $n=7$  NR and  $3$  R for N,  $n=5$  NR and  $4$  R for I+N). c, Analysis of change in tumor T cell repertoire was performed using differential abundance analysis with significantly expanded and contracted clones. Differential abundance of tumor clonotypes was assessed using a modification of the DESeq R package. d, e, Change in T cell repertoire was assessed for number of significantly expanded clonotypes ( $n=6$  NR and  $3$  R for N,  $n=5$  NR and  $4$  R for I+N) and Morisita Overlap index ( $n=6$  NR and  $3$  R for N,  $n=5$  NR and  $4$  R for I+N). f, Numbers of significantly expanded tumor restricted clonotypes in the peripheral blood are shown by pathologic response,  $n=12$  NR and  $7$  R for b/l tumor restricted clones and  $n=11$  NR and  $7$  R for on-tx tumor restricted clones. For a, b, d-f, Bar heights indicate median values, and interquartile ranges are presented in addition to individual data points. For a, f, Black dots indicate patients treated with N and red dots patients treated with I+N. All comparisons were made using Mann-Whitney U tests with two-sided testing.

| <b>Supplementary Table 1. Patient and Clinical Characteristics.</b> |                             |                                          |
|---------------------------------------------------------------------|-----------------------------|------------------------------------------|
| <b>Characteristic</b>                                               | <b>Nivolumab<br/>(n=12)</b> | <b>Ipilimumab +<br/>Nivolumab (n=11)</b> |
| <b>Age (years), median (range)</b>                                  | 55 (34 – 73)                | 49 (29 – 74)                             |
| <b>Gender, n (%)</b>                                                |                             |                                          |
| Male                                                                | 9 (75)                      | 10 (91)                                  |
| Female                                                              | 3 (25)                      | 1 (9)                                    |
| <b>ECOG PS, n (%)</b>                                               |                             |                                          |
| 0                                                                   | 12 (100)                    | 11 (100)                                 |
| <b>AJCC 7<sup>th</sup> Edition Clinical Stage, n (%)</b>            |                             |                                          |
| IIIB                                                                | 6 (50)                      | 3 (27)                                   |
| IIIC                                                                | 5 (42)                      | 5 (45)                                   |
| IV                                                                  | 1 (8)                       | 3 (27)                                   |
| <b>AJCC 8<sup>th</sup> Edition Clinical Stage, n (%)</b>            |                             |                                          |
| IIIB                                                                | 2 (17)                      | 3 (27)                                   |
| IIIC                                                                | 6 (50)                      | 4 (36)                                   |
| IIID                                                                | 3 (25)                      | 1 (9)                                    |
| IV                                                                  | 1 (8)                       | 3 (27)                                   |
| <b>LDH (U/L)<sup>a</sup>, n (%)</b>                                 |                             |                                          |
| ≤ ULN                                                               | 10 (83)                     | 11 (100)                                 |
| > ULN                                                               | 2 (17)                      | 0                                        |
| <b>Sum of Lesion Diameters (mm),<br/>median (range)</b>             | 28.5 (11.0 – 82.0)          | 31.0 (12.0 – 61.0)                       |
| <b>Primary Tumor Type - no (%)</b>                                  |                             |                                          |
| Superficial Spreading                                               | 5 (42)                      | 2 (18)                                   |
| Nodular                                                             | 1 (8)                       | 4 (36)                                   |
| Lentigo maligna                                                     | 1 (8)                       | 0 (0)                                    |
| Acral Lentiginous                                                   | 0 (0)                       | 0 (0)                                    |
| Unclassified                                                        | 2 (17)                      | 1 (9)                                    |
| Unknown Primary                                                     | 3 (25)                      | 4 (36)                                   |
| <b>PD-L1, n (%)</b>                                                 |                             |                                          |

|                                                                                                                                                                                                                                                                                                                                                                                                                                                                                                                                                                                                                                        |                    |                     |
|----------------------------------------------------------------------------------------------------------------------------------------------------------------------------------------------------------------------------------------------------------------------------------------------------------------------------------------------------------------------------------------------------------------------------------------------------------------------------------------------------------------------------------------------------------------------------------------------------------------------------------------|--------------------|---------------------|
| Positive ( $\geq 1\%$ )                                                                                                                                                                                                                                                                                                                                                                                                                                                                                                                                                                                                                | 8 (67)             | 7 (64)              |
| Negative ( $< 1\%$ )                                                                                                                                                                                                                                                                                                                                                                                                                                                                                                                                                                                                                   | 4 (33)             | 4 (36)              |
| <b>Mutation Status, n (%)</b>                                                                                                                                                                                                                                                                                                                                                                                                                                                                                                                                                                                                          |                    |                     |
| BRAF mutated <sup>β</sup>                                                                                                                                                                                                                                                                                                                                                                                                                                                                                                                                                                                                              | 7 (58)             | 4 (36)              |
| NRAS mutated                                                                                                                                                                                                                                                                                                                                                                                                                                                                                                                                                                                                                           | 1 (8)              | 3 (27)              |
| CKIT mutated                                                                                                                                                                                                                                                                                                                                                                                                                                                                                                                                                                                                                           | 0                  | 0                   |
| <b>Prior Therapy, n (%)</b>                                                                                                                                                                                                                                                                                                                                                                                                                                                                                                                                                                                                            |                    |                     |
| Treatment Naïve                                                                                                                                                                                                                                                                                                                                                                                                                                                                                                                                                                                                                        | 7 (58)             | 4 (36)              |
| Surgery                                                                                                                                                                                                                                                                                                                                                                                                                                                                                                                                                                                                                                | 4 (33)             | 4 (36)              |
| Surgery and Systemic Therapy                                                                                                                                                                                                                                                                                                                                                                                                                                                                                                                                                                                                           | 0                  | 3 (27) <sup>‡</sup> |
| Surgery, Radiation, and Systemic Therapy                                                                                                                                                                                                                                                                                                                                                                                                                                                                                                                                                                                               | 1 (8) <sup>*</sup> | 0                   |
| <p>Note: All p-values <math>\geq 0.19</math> and were calculated used two-sided Fisher's exact tests.</p> <p><sup>α</sup>All samples measured in common lab, with upper limit of normal being 618 U/L.</p> <p><sup>β</sup>All V600E except one tumor that was V600R.</p> <p><sup>‡</sup> 2 patients received adjuvant interferon (one only 6 weeks), another peginterferon after prior surgical resection.</p> <p><sup>*</sup>1 patient received neoadjuvant dabrafenib + trametinib for 2 months followed by surgery, and then adjuvant radiation as well as biochemotherapy with dacarbazine, vinblastine, interferon, and IL-2.</p> |                    |                     |

**Supplementary Table 2. Adverse Events During Neoadjuvant Treatment\*.**

|                                            | <b>Nivolumab<br/>(n=12)</b> |      |                |     | <b>Ipilimumab + Nivolumab<br/>(n=11)</b> |      |                |      |
|--------------------------------------------|-----------------------------|------|----------------|-----|------------------------------------------|------|----------------|------|
|                                            | Any Grade<br>(n)            | %    | Grade 3<br>(n) | %   | Any Grade<br>(n)                         | %    | Grade 3<br>(n) | %    |
| <b><u>Any Adverse Event</u></b>            | 11                          | (92) | 1              | (8) | 10                                       | (91) | 8              | (73) |
| <b>Fatigue</b>                             | 8                           | (67) | 0              | (0) | 6                                        | (55) | 0              | (0)  |
| <b>Headache</b>                            | 5                           | (42) | 0              | (0) | 3                                        | (27) | 0              | (0)  |
| <b>Pruritus</b>                            | 4                           | (33) | 0              | (0) | 3                                        | (27) | 0              | (0)  |
| <b>Tumor Pain</b>                          | 3                           | (25) | 1              | (8) | 3                                        | (27) | 0              | (0)  |
| <b>Rash (acneiform, maculopapular)</b>     | 2                           | (17) | 0              | (0) | 8                                        | (73) | 0              | (0)  |
| <b>Diarrhea</b>                            | 2                           | (17) | 0              | (0) | 7                                        | (64) | 0              | (0)  |
| <b>Transaminitis</b>                       | 2                           | (17) | 0              | (0) | 7                                        | (64) | 3              | (27) |
| <b>Vomiting</b>                            | 2                           | (17) | 0              | (0) | 4                                        | (36) | 0              | (0)  |
| <b>Weight loss/<br/>Anorexia</b>           | 2                           | (17) | 0              | (0) | 3                                        | (27) | 0              | (0)  |
| <b>Arthralgia</b>                          | 2                           | (17) | 0              | (0) | 4                                        | (36) | 1              | (9)  |
| <b>Fever/Chills/Flu like Symptoms</b>      | 1                           | (8)  | 0              | (0) | 7                                        | (64) | 0              | (0)  |
| <b>Cough</b>                               | 1                           | (8)  | 0              | (0) | 4                                        | (36) | 0              | (0)  |
| <b>Hyperthyroidism/<br/>thyrotoxicosis</b> | 1                           | (8)  | 0              | (0) | 3                                        | (27) | 1              | (9)  |
| <b>Anemia</b>                              | 1                           | (8)  | 0              | (0) | 3                                        | (27) | 0              | (0)  |
| <b>Nasal congestion</b>                    | 1                           | (8)  | 0              | (0) | 3                                        | (27) | 0              | (0)  |
| <b>Night sweats</b>                        | 1                           | (8)  | 0              | (0) | 2                                        | (18) | 0              | (0)  |
| <b>New skin lesions</b>                    | 1                           | (8)  | 0              | (0) | 2                                        | (18) | 0              | (0)  |
| <b>Pneumonia</b>                           | 1                           | (8)  | 0              | (0) | 2                                        | (18) | 2              | (18) |
| <b>Myositis/myalgia</b>                    | 1                           | (8)  | 0              | (0) | 2                                        | (18) | 1              | (9)  |
| <b>Hypomagnesemia</b>                      | 1                           | (8)  | 0              | (0) | 2                                        | (18) | 0              | (0)  |
| <b>Hypothyroidism</b>                      | 0                           | (0)  | 0              | (0) | 4                                        | (36) | 0              | (0)  |
| <b>Dyspnea</b>                             | 0                           | (0)  | 0              | (0) | 3                                        | (27) | 0              | (0)  |
| <b>Colitis</b>                             | 0                           | (0)  | 0              | (0) | 2                                        | (18) | 2              | (18) |

|                          |   |     |   |     |   |      |   |      |
|--------------------------|---|-----|---|-----|---|------|---|------|
| <b>Dehydration</b>       | 0 | (0) | 0 | (0) | 2 | (18) | 2 | (18) |
| <b>Fall</b>              | 0 | (0) | 0 | (0) | 1 | (9)  | 1 | (9)  |
| <b>Hyperglycemia</b>     | 0 | (0) | 0 | (0) | 1 | (9)  | 1 | (9)  |
| <b>Hypokalemia</b>       | 0 | (0) | 0 | (0) | 1 | (9)  | 1 | (9)  |
| <b>Hyponatremia</b>      | 0 | (0) | 0 | (0) | 2 | (18) | 2 | (18) |
| <b>Sinus tachycardia</b> | 0 | (0) | 0 | (0) | 1 | (9)  | 1 | (9)  |

\*Includes all treated related adverse events (AEs) present in  $\geq 10\%$  of cases in addition to all grade 3 AEs.

\*Several grade 3 trAEs co-occurred such as thyrotoxicosis, sinus tachycardia, and fall in one patient; myositis and pneumonia in one patient; dehydration, hyponatremia, hypokalemia, and transaminitis in one patient, and colitis, dehydration, hyponatremia, hyperglycemia, and arthralgia in one patient.

**Supplementary Table 3. Adverse Events During Post-Surgical and Adjuvant Treatment\*.**

|                                           | <b>Nivolumab<br/>(n=10)</b> |                     | <b>Ipilimumab + Nivolumab<br/>(n=11)</b> |                     |
|-------------------------------------------|-----------------------------|---------------------|------------------------------------------|---------------------|
|                                           | Any Grade,<br>n (%)         | Grade 3-4,<br>n (%) | Any Grade,<br>n (%)                      | Grade 3-4,<br>n (%) |
| <b><u>Any Adverse Event</u></b>           | 6 (60)                      | 2 (20)              | 9 (82)                                   | 2 (18)              |
| <b>Transaminitis</b>                      | 2 (20)                      | 0 (0)               | 3 (27)                                   | 0 (0)               |
| <b>Weight loss/Anorexia</b>               | 2 (20)                      | 0 (0)               | 2 (18)                                   | 0 (0)               |
| <b>Fever/Chills/Flu-like<br/>Symptoms</b> | 1 (10)                      | 0 (0)               | 2 (18)                                   | 0 (0)               |
| <b>Hypothyroidism</b>                     | 4 (40)                      | 0 (0)               | 0 (0)                                    | 0 (0)               |
| <b>Myositis</b>                           | 0 (0)                       | 0 (0)               | 3 (27)                                   | 0 (0)               |
| <b>Rash</b>                               | 2 (20)                      | 0 (0)               | 1 (9)                                    | 0 (0)               |
| <b>Skin<br/>hypopigmentation</b>          | 2 (20)                      | 0 (0)               | 1 (9)                                    | 0 (0)               |
| <b>Hypophysitis</b>                       | 0 (0)                       | 0 (0)               | 1 (9)                                    | 1 (9)               |
| <b>Diabetic Ketoacidosis</b>              | 1 (10)                      | 1 (10)              | 0 (0)                                    | 0 (0)               |
| <b>Hypoalbuminemia</b>                    | 1 (10)                      | 0 (0)               | 1 (9)                                    | 1 (9)               |
| <b>Colitis</b>                            | 1 (10)                      | 1 (10)              | 0 (0)                                    | 0 (0)               |

\*Includes all treatment related adverse events (AEs) present in  $\geq 10\%$  of cases in addition to all grade 3-4 AEs in the patients who received surgical resection.

\*The patients that developed  $\geq$ grade 3 hypophysitis, diabetic ketoacidosis, and colitis did not have  $\geq$ grade 3 trAEs in the neoadjuvant period.

**Supplementary Table 4. Immune Markers Plotted in Volcano Plot (Combined Treatment Arms by RECIST response).**

| <b>Marker</b>           | <b>p value</b> | <b>Effect Size</b> | <b>Timepoint</b> |
|-------------------------|----------------|--------------------|------------------|
| PD-1                    | 0.00162        | 10.02043           | Baseline         |
| $\beta$ 2-Microglobulin | 0.00245        | 9.16763            | Baseline         |
| CD20                    | 0.00255        | 7.88843            | Baseline         |
| CD8A                    | 0.01509        | 7.67523            | Baseline         |
| CD45RO                  | 0.01577        | 7.46203            | Baseline         |
| GZMB                    | 0.01577        | 7.46203            | Baseline         |
| CD19                    | 0.01905        | 7.03562            | Baseline         |
| CD3                     | 0.01923        | 7.24882            | Baseline         |
| Ki67                    | 0.02807        | 6.82242            | Baseline         |
| VISTA                   | 0.03360        | 6.60922            | Baseline         |
| CD4                     | 0.03998        | 6.39602            | Baseline         |
| CD45                    | 0.10142        | 5.11682            | Baseline         |
| PD-L1                   | 0.10142        | 5.11682            | Baseline         |
| CD68                    | 0.23456        | 3.62441            | Baseline         |
| CD14                    | 0.29999        | 3.19801            | Baseline         |
| CD44                    | 0.60632        | 1.49241            | Baseline         |
| FoxP3                   | 0.69935        | 1.06600            | Baseline         |
| CD56                    | 0.72058        | -1.27920           | Baseline         |
| B7-H3                   | 0.79694        | -1.27920           | Baseline         |
| CD45                    | 0.00050        | 7.25000            | On-treatment     |
| CD3                     | 0.00175        | 6.75000            | On-treatment     |
| CD8A                    | 0.00175        | 6.75000            | On-treatment     |
| CD45RO                  | 0.00300        | 6.50000            | On-treatment     |
| CD19                    | 0.00415        | 5.87500            | On-treatment     |
| PD1                     | 0.01598        | 5.50000            | On-treatment     |
| CD20                    | 0.04095        | 4.00000            | On-treatment     |
| GZMB                    | 0.05594        | 4.50000            | On-treatment     |



|                                                                                                                                                                                 |         |          |              |
|---------------------------------------------------------------------------------------------------------------------------------------------------------------------------------|---------|----------|--------------|
| <b>CD56</b>                                                                                                                                                                     | 0.10128 | -3.00000 | On-treatment |
| <b>Beta-2-Microglobulin</b>                                                                                                                                                     | 0.11788 | 3.75000  | On-treatment |
| <b>B7.H3</b>                                                                                                                                                                    | 0.26349 | -2.75000 | On-treatment |
| <b>CD14</b>                                                                                                                                                                     | 0.31319 | -2.50000 | On-treatment |
| <b>PD.L1</b>                                                                                                                                                                    | 0.36763 | 2.25000  | On-treatment |
| <b>CD4</b>                                                                                                                                                                      | 0.42782 | 2.00000  | On-treatment |
| <b>VISTA</b>                                                                                                                                                                    | 0.71279 | 1.00000  | On-treatment |
| <b>FoxP3</b>                                                                                                                                                                    | 0.87038 | 0.50000  | On-treatment |
| <b>Ki67</b>                                                                                                                                                                     | 0.87488 | -0.50000 | On-treatment |
| <b>CD68</b>                                                                                                                                                                     | 0.95672 | -0.25000 | On-treatment |
| <b>CD44</b>                                                                                                                                                                     | 1.00000 | 0.00000  | On-treatment |
| Two-sided comparisons between non-responders (NR) and responders (R) at baseline (n=11 NR and 11 R) and on-treatment (n=10 NR and 6 R) were made using the Mann-Whitney U test. |         |          |              |

| <b>Supplementary Table 5. Immune Markers Plotted in Volcano Plot (Ipilimumab+Nivolumab by RECIST response).</b> |                |                    |                  |
|-----------------------------------------------------------------------------------------------------------------|----------------|--------------------|------------------|
| <b>Marker</b>                                                                                                   | <b>p value</b> | <b>Effect Size</b> | <b>Timepoint</b> |
| CD14                                                                                                            | 0.04444        | 2.52982            | Baseline         |
| CD3                                                                                                             | 0.04444        | 2.52982            | Baseline         |
| CD4                                                                                                             | 0.04444        | 2.52982            | Baseline         |
| CD45                                                                                                            | 0.04444        | 2.52982            | Baseline         |
| CD45RO                                                                                                          | 0.04444        | 2.52982            | Baseline         |
| PD1                                                                                                             | 0.04444        | 2.52982            | Baseline         |
| VISTA                                                                                                           | 0.04444        | 2.52982            | Baseline         |
| CD68                                                                                                            | 0.08576        | 2.21359            | Baseline         |
| $\beta$ 2-Microglobulin                                                                                         | 0.08889        | 2.21359            | Baseline         |
| CD8A                                                                                                            | 0.08889        | 2.21359            | Baseline         |
| GZMB                                                                                                            | 0.08889        | 2.21359            | Baseline         |
| Ki67                                                                                                            | 0.08889        | 2.21359            | Baseline         |
| CD19                                                                                                            | 0.13841        | 1.89737            | Baseline         |
| PD.L1                                                                                                           | 0.26667        | 1.58114            | Baseline         |
| CD20                                                                                                            | 0.30319        | 1.26491            | Baseline         |
| FoxP3                                                                                                           | 0.40000        | -1.26491           | Baseline         |
| B7.H3                                                                                                           | 0.53333        | -0.94868           | Baseline         |
| CD56                                                                                                            | 0.57615        | 0.63246            | Baseline         |
| CD44                                                                                                            | 1.00000        | 0.00000            | Baseline         |
| CD45                                                                                                            | 0.07143        | 2.12132            | On-treatment     |
| CD45RO                                                                                                          | 0.07143        | 2.12132            | On-treatment     |
| CD8A                                                                                                            | 0.07143        | 2.12132            | On-treatment     |
| Ki67                                                                                                            | 0.07143        | -2.47487           | On-treatment     |
| PD1                                                                                                             | 0.14286        | 1.76777            | On-treatment     |
| CD19                                                                                                            | 0.22170        | 1.41421            | On-treatment     |
| CD3                                                                                                             | 0.25000        | 1.41421            | On-treatment     |

|                                                                                                                                                                              |         |          |              |
|------------------------------------------------------------------------------------------------------------------------------------------------------------------------------|---------|----------|--------------|
| <b>FoxP3</b>                                                                                                                                                                 | 0.45336 | -1.23744 | On-treatment |
| <b>B7.H3</b>                                                                                                                                                                 | 0.57143 | -1.06066 | On-treatment |
| <b>CD4</b>                                                                                                                                                                   | 0.57143 | -1.06066 | On-treatment |
| <b>PD.L1</b>                                                                                                                                                                 | 0.57143 | -1.06066 | On-treatment |
| <b>β2-Microglobulin</b>                                                                                                                                                      | 0.78571 | 0.35355  | On-treatment |
| <b>CD14</b>                                                                                                                                                                  | 0.78571 | -0.70711 | On-treatment |
| <b>CD68</b>                                                                                                                                                                  | 0.78571 | -0.70711 | On-treatment |
| <b>GZMB</b>                                                                                                                                                                  | 0.78571 | 0.35355  | On-treatment |
| <b>CD44</b>                                                                                                                                                                  | 1.00000 | -0.35355 | On-treatment |
| <b>CD20</b>                                                                                                                                                                  | 1.00000 | 0.00000  | On-treatment |
| <b>VISTA</b>                                                                                                                                                                 | 1.00000 | 0.00000  | On-treatment |
| Two-sided comparisons between non-responders (NR) and responders (R) at baseline (n=2 NR and 8 R) and on-treatment (n=3 NR and 5 R) were made using the Mann-Whitney U test. |         |          |              |

**Supplementary Table 6. Immune Markers Plotted in Volcano Plot (Nivolumab by RECIST response).**

| <b>Marker</b>           | <b>p value</b> | <b>Effect Size</b> | <b>Timepoint</b> |
|-------------------------|----------------|--------------------|------------------|
| <b>CD20</b>             | 0.00160        | 3.46410            | Baseline         |
| <b>β2-Microglobulin</b> | 0.00909        | 3.46410            | Baseline         |
| <b>CD45</b>             | 0.00909        | 3.46410            | Baseline         |
| <b>CD19</b>             | 0.02993        | 2.88675            | Baseline         |
| <b>CD3</b>              | 0.03636        | 2.88675            | Baseline         |
| <b>PD.L1</b>            | 0.03636        | 2.88675            | Baseline         |
| <b>CD4</b>              | 0.06364        | 2.59808            | Baseline         |
| <b>PD-1</b>             | 0.06399        | 2.59808            | Baseline         |
| <b>CD8A</b>             | 0.10000        | 2.30940            | Baseline         |
| <b>FoxP3</b>            | 0.10000        | 2.30940            | Baseline         |
| <b>VISTA</b>            | 0.14545        | 2.02073            | Baseline         |
| <b>CD44</b>             | 0.20909        | 1.73205            | Baseline         |
| <b>CD45RO</b>           | 0.20909        | 1.73205            | Baseline         |
| <b>GZMB</b>             | 0.20909        | 1.73205            | Baseline         |
| <b>Ki67</b>             | 0.20909        | 1.73205            | Baseline         |
| <b>CD14</b>             | 0.28182        | 1.44338            | Baseline         |
| <b>CD56</b>             | 0.33165        | -1.73205           | Baseline         |
| <b>CD68</b>             | 0.71105        | 0.28868            | Baseline         |
| <b>B7.H3</b>            | 0.86364        | 0.00000            | Baseline         |
| <b>CD19</b>             | 0.02334        | 1.41421            | On-treatment     |
| <b>CD20</b>             | 0.02334        | 1.41421            | On-treatment     |
| <b>β2-Microglobulin</b> | 0.25000        | 1.41421            | On-treatment     |
| <b>CD3</b>              | 0.25000        | 1.41421            | On-treatment     |
| <b>CD4</b>              | 0.25000        | 1.41421            | On-treatment     |
| <b>CD45</b>             | 0.25000        | 1.41421            | On-treatment     |
| <b>CD45RO</b>           | 0.25000        | 1.41421            | On-treatment     |

|              |         |          |              |
|--------------|---------|----------|--------------|
| <b>CD8A</b>  | 0.25000 | 1.41421  | On-treatment |
| <b>GZMB</b>  | 0.25000 | 1.41421  | On-treatment |
| <b>PD-1</b>  | 0.25000 | 1.41421  | On-treatment |
| <b>PD.L1</b> | 0.25000 | 1.41421  | On-treatment |
| <b>CD56</b>  | 0.48550 | -0.53033 | On-treatment |
| <b>CD14</b>  | 0.50000 | 1.06066  | On-treatment |
| <b>CD68</b>  | 0.50000 | 1.06066  | On-treatment |
| <b>FoxP3</b> | 0.50000 | 1.06066  | On-treatment |
| <b>Ki67</b>  | 0.50000 | 1.06066  | On-treatment |
| <b>VISTA</b> | 0.50000 | 1.06066  | On-treatment |
| <b>CD44</b>  | 0.75000 | 0.70711  | On-treatment |
| <b>B7.H3</b> | 1.00000 | 0.00000  | On-treatment |

Two-sided comparisons between non-responders (NR) and responders (R) at baseline (n=9 NR and 3 R) and on-treatment (n=7 NR and 1 R) were made using the Mann-Whitney U test.

| <b>Supplementary Table 7. Immune Markers Plotted in Volcano Plot (Combined Treatment Arms by pathologic response).</b> |                |                    |                  |
|------------------------------------------------------------------------------------------------------------------------|----------------|--------------------|------------------|
| <b>Marker</b>                                                                                                          | <b>p value</b> | <b>Effect Size</b> | <b>Timepoint</b> |
| <b>β2-Microglobulin</b>                                                                                                | 0.00060        | 10.23363           | Baseline         |
| <b>CD20</b>                                                                                                            | 0.00111        | 8.74123            | Baseline         |
| <b>PD-1</b>                                                                                                            | 0.02219        | 7.46203            | Baseline         |
| <b>GZMB</b>                                                                                                            | 0.05937        | 6.18282            | Baseline         |
| <b>CD45RO</b>                                                                                                          | 0.06983        | 5.96962            | Baseline         |
| <b>VISTA</b>                                                                                                           | 0.06983        | 5.96962            | Baseline         |
| <b>CD45</b>                                                                                                            | 0.08170        | 5.75642            | Baseline         |
| <b>CD19</b>                                                                                                            | 0.10682        | 5.11682            | Baseline         |
| <b>CD8A</b>                                                                                                            | 0.10863        | 5.33002            | Baseline         |
| <b>CD4</b>                                                                                                             | 0.10998        | 5.33002            | Baseline         |
| <b>CD3</b>                                                                                                             | 0.18760        | 4.47722            | Baseline         |
| <b>CD44</b>                                                                                                            | 0.23824        | 4.05081            | Baseline         |
| <b>Ki67</b>                                                                                                            | 0.23824        | 4.05081            | Baseline         |
| <b>PD.L1</b>                                                                                                           | 0.23824        | 4.05081            | Baseline         |
| <b>CD14</b>                                                                                                            | 0.44114        | 2.77161            | Baseline         |
| <b>B7.H3</b>                                                                                                           | 0.48217        | 2.55841            | Baseline         |
| <b>CD56</b>                                                                                                            | 0.54575        | -1.27920           | Baseline         |
| <b>CD68</b>                                                                                                            | 0.70578        | 1.49241            | Baseline         |
| <b>FoxP3</b>                                                                                                           | 0.81540        | 1.06600            | Baseline         |
| <b>CD8A</b>                                                                                                            | 0.00321        | 6.25000            | On-treatment     |
| <b>CD19</b>                                                                                                            | 0.00762        | 5.37500            | On-treatment     |
| <b>CD45</b>                                                                                                            | 0.00870        | 5.75000            | On-treatment     |
| <b>CD3</b>                                                                                                             | 0.01923        | 5.25000            | On-treatment     |
| <b>CD45RO</b>                                                                                                          | 0.02747        | 5.00000            | On-treatment     |
| <b>PD-1</b>                                                                                                            | 0.02747        | 5.00000            | On-treatment     |
| <b>GZMB</b>                                                                                                            | 0.05174        | 4.50000            | On-treatment     |

|                                                                                                                                                                                |         |          |              |
|--------------------------------------------------------------------------------------------------------------------------------------------------------------------------------|---------|----------|--------------|
| <b>β2-Microglobulin</b>                                                                                                                                                        | 0.06868 | 4.25000  | On-treatment |
| <b>CD20</b>                                                                                                                                                                    | 0.09836 | 3.25000  | On-treatment |
| <b>CD56</b>                                                                                                                                                                    | 0.15740 | -2.37500 | On-treatment |
| <b>B7.H3</b>                                                                                                                                                                   | 0.50962 | -1.50000 | On-treatment |
| <b>PD.L1</b>                                                                                                                                                                   | 0.50962 | 1.75000  | On-treatment |
| <b>CD44</b>                                                                                                                                                                    | 0.58333 | 1.50000  | On-treatment |
| <b>Ki67</b>                                                                                                                                                                    | 0.58333 | -1.25000 | On-treatment |
| <b>CD14</b>                                                                                                                                                                    | 0.66117 | -1.00000 | On-treatment |
| <b>CD4</b>                                                                                                                                                                     | 0.66117 | 1.25000  | On-treatment |
| <b>CD68</b>                                                                                                                                                                    | 0.82062 | 0.75000  | On-treatment |
| <b>VISTA</b>                                                                                                                                                                   | 0.82692 | 0.75000  | On-treatment |
| <b>FoxP3</b>                                                                                                                                                                   | 1.00000 | 0.00000  | On-treatment |
| Two-sided comparisons between non-responders (NR) and responders (R) at baseline (n=14 NR and 8 R) and on-treatment (n=11 NR and 5 R) were made using the Mann-Whitney U test. |         |          |              |

| <b>Supplementary Table 8. Immune Markers Plotted in Volcano Plot (Ipilimumab+Nivolumab by pathologic response).</b> |                |                    |                  |
|---------------------------------------------------------------------------------------------------------------------|----------------|--------------------|------------------|
| <b>Marker</b>                                                                                                       | <b>p value</b> | <b>Effect Size</b> | <b>Timepoint</b> |
| <b>β2-Microglobulin</b>                                                                                             | 0.03175        | 3.16228            | Baseline         |
| <b>FoxP3</b>                                                                                                        | 0.15079        | -2.52982           | Baseline         |
| <b>CD20</b>                                                                                                         | 0.15794        | 1.89737            | Baseline         |
| <b>B7.H3</b>                                                                                                        | 0.30952        | 1.58114            | Baseline         |
| <b>CD45RO</b>                                                                                                       | 0.30952        | 1.58114            | Baseline         |
| <b>VISTA</b>                                                                                                        | 0.30952        | 1.58114            | Baseline         |
| <b>GZMB</b>                                                                                                         | 0.54762        | 0.94868            | Baseline         |
| <b>PD-1</b>                                                                                                         | 0.54762        | 0.94868            | Baseline         |
| <b>CD4</b>                                                                                                          | 0.69048        | 0.63246            | Baseline         |
| <b>CD44</b>                                                                                                         | 0.69048        | 0.63246            | Baseline         |
| <b>CD45</b>                                                                                                         | 0.69048        | 0.63246            | Baseline         |
| <b>CD8A</b>                                                                                                         | 0.84127        | 0.31623            | Baseline         |
| <b>PD.L1</b>                                                                                                        | 0.84127        | -0.63246           | Baseline         |
| <b>CD14</b>                                                                                                         | 1.00000        | 0.00000            | Baseline         |
| <b>CD19</b>                                                                                                         | 1.00000        | 0.00000            | Baseline         |
| <b>CD3</b>                                                                                                          | 1.00000        | -0.31623           | Baseline         |
| <b>CD56</b>                                                                                                         | 1.00000        | 0.00000            | Baseline         |
| <b>CD68</b>                                                                                                         | 1.00000        | -0.31623           | Baseline         |
| <b>Ki67</b>                                                                                                         | 1.00000        | -0.31623           | Baseline         |
| <b>Ki67</b>                                                                                                         | 0.02857        | 2.82843            | On-treatment     |
| <b>CD8A</b>                                                                                                         | 0.11429        | -2.12132           | On-treatment     |
| <b>STAT3</b>                                                                                                        | 0.11429        | 2.12132            | On-treatment     |
| <b>CD19</b>                                                                                                         | 0.18315        | -1.76777           | On-treatment     |
| <b>PD-1</b>                                                                                                         | 0.20000        | -1.76777           | On-treatment     |
| <b>FoxP3</b>                                                                                                        | 0.24538        | 1.59099            | On-treatment     |
| <b>CD4</b>                                                                                                          | 0.34286        | 1.41421            | On-treatment     |



|                                                                                                                                                                              |         |          |              |
|------------------------------------------------------------------------------------------------------------------------------------------------------------------------------|---------|----------|--------------|
| <b>CD45RO</b>                                                                                                                                                                | 0.34286 | -1.41421 | On-treatment |
| <b>PD.L1</b>                                                                                                                                                                 | 0.34286 | 1.41421  | On-treatment |
| <b>β2-Microglobulin</b>                                                                                                                                                      | 0.48571 | -1.06066 | On-treatment |
| <b>CD45</b>                                                                                                                                                                  | 0.48571 | -1.06066 | On-treatment |
| <b>GZMB</b>                                                                                                                                                                  | 0.48571 | -1.06066 | On-treatment |
| <b>CD44</b>                                                                                                                                                                  | 0.68571 | -0.70711 | On-treatment |
| <b>B7.H3</b>                                                                                                                                                                 | 0.88571 | 0.35355  | On-treatment |
| <b>CD3</b>                                                                                                                                                                   | 0.88571 | -0.35355 | On-treatment |
| <b>VISTA</b>                                                                                                                                                                 | 0.88571 | 0.35355  | On-treatment |
| <b>CD14</b>                                                                                                                                                                  | 1.00000 | 0.00000  | On-treatment |
| <b>CD68</b>                                                                                                                                                                  | 1.00000 | 0.00000  | On-treatment |
| <b>CD20</b>                                                                                                                                                                  | 1.00000 | 0.00000  | On-treatment |
| Two-sided comparisons between non-responders (NR) and responders (R) at baseline (n=5 NR and 5 R) and on-treatment (n=4 NR and 4 R) were made using the Mann-Whitney U test. |         |          |              |

| <b>Supplementary Table 9. Immune Markers Plotted in Volcano Plot (Nivolumab by pathologic response).</b> |                |                    |                  |
|----------------------------------------------------------------------------------------------------------|----------------|--------------------|------------------|
| <b>Marker</b>                                                                                            | <b>p value</b> | <b>Effect Size</b> | <b>Timepoint</b> |
| <b>CD20</b>                                                                                              | 0.00160        | 3.46410            | Baseline         |
| <b>β2-Microglobulin</b>                                                                                  | 0.00909        | 3.46410            | Baseline         |
| <b>CD45</b>                                                                                              | 0.00909        | 3.46410            | Baseline         |
| <b>CD19</b>                                                                                              | 0.02993        | 2.88675            | Baseline         |
| <b>CD3</b>                                                                                               | 0.03636        | 2.88675            | Baseline         |
| <b>PD.L1</b>                                                                                             | 0.03636        | 2.88675            | Baseline         |
| <b>CD4</b>                                                                                               | 0.06364        | 2.59808            | Baseline         |
| <b>PD-1</b>                                                                                              | 0.06399        | 2.59808            | Baseline         |
| <b>CD8A</b>                                                                                              | 0.10000        | 2.30940            | Baseline         |
| <b>FoxP3</b>                                                                                             | 0.10000        | 2.30940            | Baseline         |
| <b>VISTA</b>                                                                                             | 0.14545        | 2.02073            | Baseline         |
| <b>CD44</b>                                                                                              | 0.20909        | 1.73205            | Baseline         |
| <b>CD45RO</b>                                                                                            | 0.20909        | 1.73205            | Baseline         |
| <b>GZMB</b>                                                                                              | 0.20909        | 1.73205            | Baseline         |
| <b>Ki67</b>                                                                                              | 0.20909        | 1.73205            | Baseline         |
| <b>CD14</b>                                                                                              | 0.28182        | 1.44338            | Baseline         |
| <b>CD56</b>                                                                                              | 0.33165        | -1.73205           | Baseline         |
| <b>CD68</b>                                                                                              | 0.71105        | 0.28868            | Baseline         |
| <b>B7.H3</b>                                                                                             | 0.86364        | 0.00000            | Baseline         |
| <b>CD19</b>                                                                                              | 0.02334        | 1.41421            | On-treatment     |
| <b>CD20</b>                                                                                              | 0.02334        | 1.41421            | On-treatment     |
| <b>β2-Microglobulin</b>                                                                                  | 0.25000        | 1.41421            | On-treatment     |
| <b>CD3</b>                                                                                               | 0.25000        | 1.41421            | On-treatment     |
| <b>CD4</b>                                                                                               | 0.25000        | 1.41421            | On-treatment     |
| <b>CD45</b>                                                                                              | 0.25000        | 1.41421            | On-treatment     |
| <b>CD45RO</b>                                                                                            | 0.25000        | 1.41421            | On-treatment     |

|              |         |          |              |
|--------------|---------|----------|--------------|
| <b>CD8A</b>  | 0.25000 | 1.41421  | On-treatment |
| <b>GZMB</b>  | 0.25000 | 1.41421  | On-treatment |
| <b>PD-1</b>  | 0.25000 | 1.41421  | On-treatment |
| <b>PD.L1</b> | 0.25000 | 1.41421  | On-treatment |
| <b>CD56</b>  | 0.48550 | -0.53033 | On-treatment |
| <b>CD14</b>  | 0.50000 | 1.06066  | On-treatment |
| <b>CD68</b>  | 0.50000 | 1.06066  | On-treatment |
| <b>FoxP3</b> | 0.50000 | 1.06066  | On-treatment |
| <b>Ki67</b>  | 0.50000 | 1.06066  | On-treatment |
| <b>VISTA</b> | 0.50000 | 1.06066  | On-treatment |
| <b>CD44</b>  | 0.75000 | 0.70711  | On-treatment |
| <b>B7.H3</b> | 1.00000 | 0.00000  | On-treatment |

Two-sided comparisons between non-responders (NR) and responders (R) at baseline (n=9 NR and 3 R) and on-treatment (n=7 NR and 1 R) were made using the Mann-Whitney U test.

**Supplementary Table 10. Timing of On-treatment Sample Collection for Correlative Studies.**

| <b>Treatment</b> | <b>Radiographic Response</b> | <b>Pathologic Response</b> | <b>IHC</b> | <b>Nanostring</b> | <b>TCR Seq Tumor</b> | <b>TCR Seq Blood for Expansion Analyses</b> |
|------------------|------------------------------|----------------------------|------------|-------------------|----------------------|---------------------------------------------|
| Ipi+nivo         | R                            | Non-pCR                    | Wk 4       | n/a               | Wk 4                 | Wk 4                                        |
| Ipi+nivo         | R                            | pCR                        | Wk 4       | n/a               | Wk 4                 | Wk 4                                        |
| Ipi+nivo         | R                            | pCR                        | Wk 4       | Wk 4              | Wk 4                 | Wk 4                                        |
| Ipi+nivo         | R                            | pCR                        | Wk 4       | Wk 4              | Wk 4                 | Wk 4                                        |
| Ipi+nivo         | R                            | pCR                        | Wk 4       | Wk 4              | Wk 4                 | Wk 4                                        |
| Ipi+nivo         | R                            | pCR                        | Wk 4       | Wk 4              | n/a                  | n/a                                         |
| Ipi+nivo         | R                            | Non-pCR                    | Wk 4       | Wk 4              | Wk 4                 | n/a                                         |
| Ipi+nivo         | R                            | Non-pCR                    | n/a        | n/a               | Wk 4                 | Wk 4                                        |
| Ipi+nivo         | NR                           | Non-pCR                    | Wk 4       | Wk 4              | Wk 4                 | Wk 4                                        |
| Ipi+nivo         | NR                           | Non-pCR                    | Wk 4       | Wk 4              | Wk 4                 | Wk 4                                        |
| Ipi+nivo         | NR                           | Non-pCR                    | Wk 4       | Wk 4              | Wk 4                 | Wk 4                                        |
| Nivo             | R                            | pCR                        | Wk 3       | n/a               | Wk 3                 | Wk 3                                        |
| Nivo             | R                            | pCR                        | Wk 3       | n/a               | Wk 3                 | Wk 3                                        |
| Nivo             | R                            | pCR                        | Wk 3       | Wk 3              | Wk 3                 | Wk 3                                        |
| Nivo             | NR                           | Non-pCR                    | Wk 3       | Wk 3              | Wk 3                 | Wk 3                                        |
| Nivo             | NR                           | Non-pCR                    | n/a        | n/a               | Wk 3                 | Wk 3                                        |
| Nivo             | NR                           | Non-pCR                    | Wk 3       | Wk 3              | Wk 3                 | Wk 3                                        |
| Nivo             | NR                           | Non-pCR                    | Wk 5       | Wk 3              | Wk 5                 | Wk 3                                        |
| Nivo             | NR                           | Non-pCR                    | Wk 3       | Wk 3              | Wk 3                 | Wk 3                                        |
| Nivo             | NR                           | Non-pCR                    | Wk 3       | Wk 3              | n/a                  | n/a                                         |
| Nivo             | NR                           | Non-pCR                    | Wk 5       | n/a               | n/a                  | Wk 3                                        |
| Nivo             | NR                           | Non-pCR                    | Wk 3       | Wk 3              | Wk 3                 | Wk 3                                        |
| Nivo             | NR                           | Non-pCR                    | Wk 3       | Wk 3              | Wk 3                 | n/a                                         |

NR, non-responder; R, responder; Non-pCR, non-pathologic complete response; pCR, pathologic complete response; n/a, not available

**Supplementary Table 11. Prior beta distributions.**

| Number of patients in each treatment group | Prior beta distribution |                | Posterior Probability of response |             |
|--------------------------------------------|-------------------------|----------------|-----------------------------------|-------------|
|                                            | Nivo                    | Ipi+Nivo       | RECIST                            | pCR         |
| 1                                          | (0.05, 0.95)            | (0.15, 0.85)   | 0.99                              | 0.86        |
| 10                                         | (0.5, 9.5)              | (1.5, 8.5)     | 0.99                              | 0.89        |
| <b>20</b>                                  | <b>(1,19)</b>           | <b>(3, 17)</b> | <b>0.99</b>                       | <b>0.92</b> |
| 100                                        | (5, 95)                 | (15, 85)       | 1.00                              | 0.99        |
| 500                                        | (25, 475)               | (75, 425)      | 1.00                              | 1.00        |
